# Supplementary material for: ADAR3 activates NF-κB signaling and promotes glioblastoma cell resistance to temozolomide
Source: PubMed Central journal article supplement (PMC9349284; doi:10.1038/s41598-022-17559-4), 2022-08-03
Supplement: 41598_2022_17559_MOESM5_ESM.pdf [file 41598_2022_17559_MOESM5_ESM.pdf]

**Figure S3**

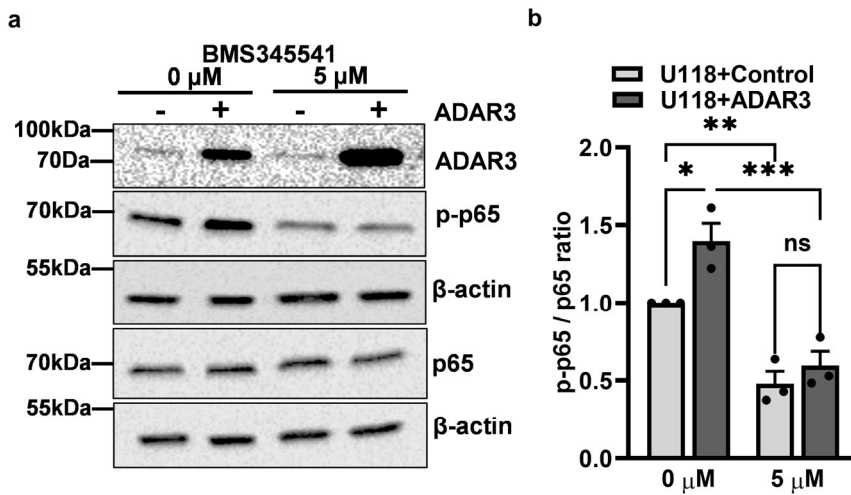

**Supplementary Figure S3. ADAR3 expression leads to increased p65 phosphorylation in U118 glioblastoma cells.** (a) Control and ADAR3-expressing U118 cells were treated with 0 (DMSO only) or 5 μM of BMS345541 for 24 h. An equivalent amount of cell lysates was subjected to quantitative immunoblotting with antibodies against p65, phosphorylated S356 p65 (p-p65), and β-actin. Blot is a representative image (replicate 1) of three biological replicates and the original images are included in supplementary information file. (b) The ratio of p-p65 to total p65 relative to β-actin was quantified and normalized to U118 control cells with 0 μM BMS345541 treatment. The mean of three biological replicates is plotted with error bars representing SEM. Statistical significance was determined using two-way ANOVA Tukey's multiple comparisons test. \* $p \leq 0.05$ , \*\* $p \leq 0.005$  \*\*\* $p \leq 0.0005$ , ns indicates no significant difference.
