# Supplementary material for: ADAR3 activates NF-κB signaling and promotes glioblastoma cell resistance to temozolomide
Source: PubMed Central journal article supplement (PMC9349284; doi:10.1038/s41598-022-17559-4), 2022-08-03
Supplement: 41598_2022_17559_MOESM6_ESM.pdf [file 41598_2022_17559_MOESM6_ESM.pdf]

**Figure S4**

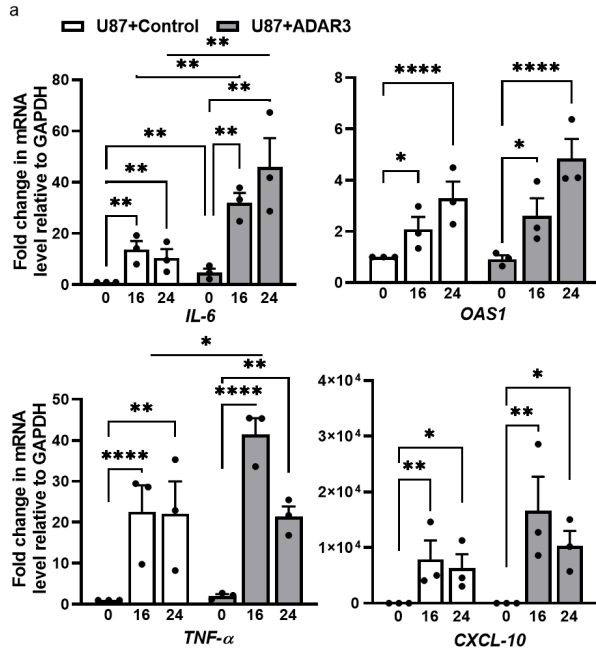

**Supplementary Figure S4. ADAR3-expressing cells exhibit increased expression of NF- $\kappa$ B target genes in response to poly I:C treatment.** Cells of the indicated genotypes were transfected with 500 ng/ml of Poly I:C for 0, 16, and 24 h. Expression of each indicated gene was determined relative to the expression of *GAPDH* determined by qRT-PCR in the same cell lines and was normalized to the expression of same gene relative to *GAPDH* in control cells at 0 h. The mean of three biological replicates is plotted with error bars representing SEM. Statistical significance was determined using two-way ANOVA Fisher's LSD test. \* $p \leq 0.05$ , \*\* $p \leq 0.005$ , \*\*\*\* $p < 0.0001$ .
